# Supplementary material for: Temperature variation between neighboring days and mortality: a distributed lag non-linear analysis
Source: Springer Nature journal article supplement (doi:10.1007/s00038-014-0611-5), 2014-10-03
Supplement: MOESM1 [file 38_2014_611_MOESM1_ESM.pdf]

**Temperature variation between neighboring days and mortality:**

**a distributed lag non-linear analysis**

**Jian Cheng <sup>a,1</sup>; Rui Zhu <sup>b,1</sup>; Zhiwei Xu <sup>c</sup>; Xiangqing Xu <sup>d</sup>; Xu Wang <sup>a</sup>; Kesheng**

**Li <sup>a</sup>; Hong Su <sup>a,\*</sup>**

<sup>a</sup> Department of Epidemiology and Health Statistics, School of Public Health, Anhui Medical University, Hefei, Anhui, China

<sup>b</sup> Department of Child and Maternal Health Care, School of Public Health, Anhui Medical University, Hefei, Anhui, China

<sup>c</sup> School of Public Health and Social Work & Institute of Health and Biomedical Innovation, Queensland University of Technology, Kelvin Grove, Brisbane, Qld, Australia

<sup>d</sup> Maanshan Health Bureau of Huashan district, Maanshan, Anhui, China

<sup>1</sup> Co-first Author

\* Corresponding author

**Corresponding author:** Hong Su, Department of Epidemiology and Health Statistics, School of Public Health, Anhui Medical University, 81 Meishan Road, Hefei, Anhui Province 230032, China.

Tel.: +86 55163869140; Fax: +86 55163869140

E-mail: [suhong5151@sina.com](mailto:suhong5151@sina.com)

## Figures and legends

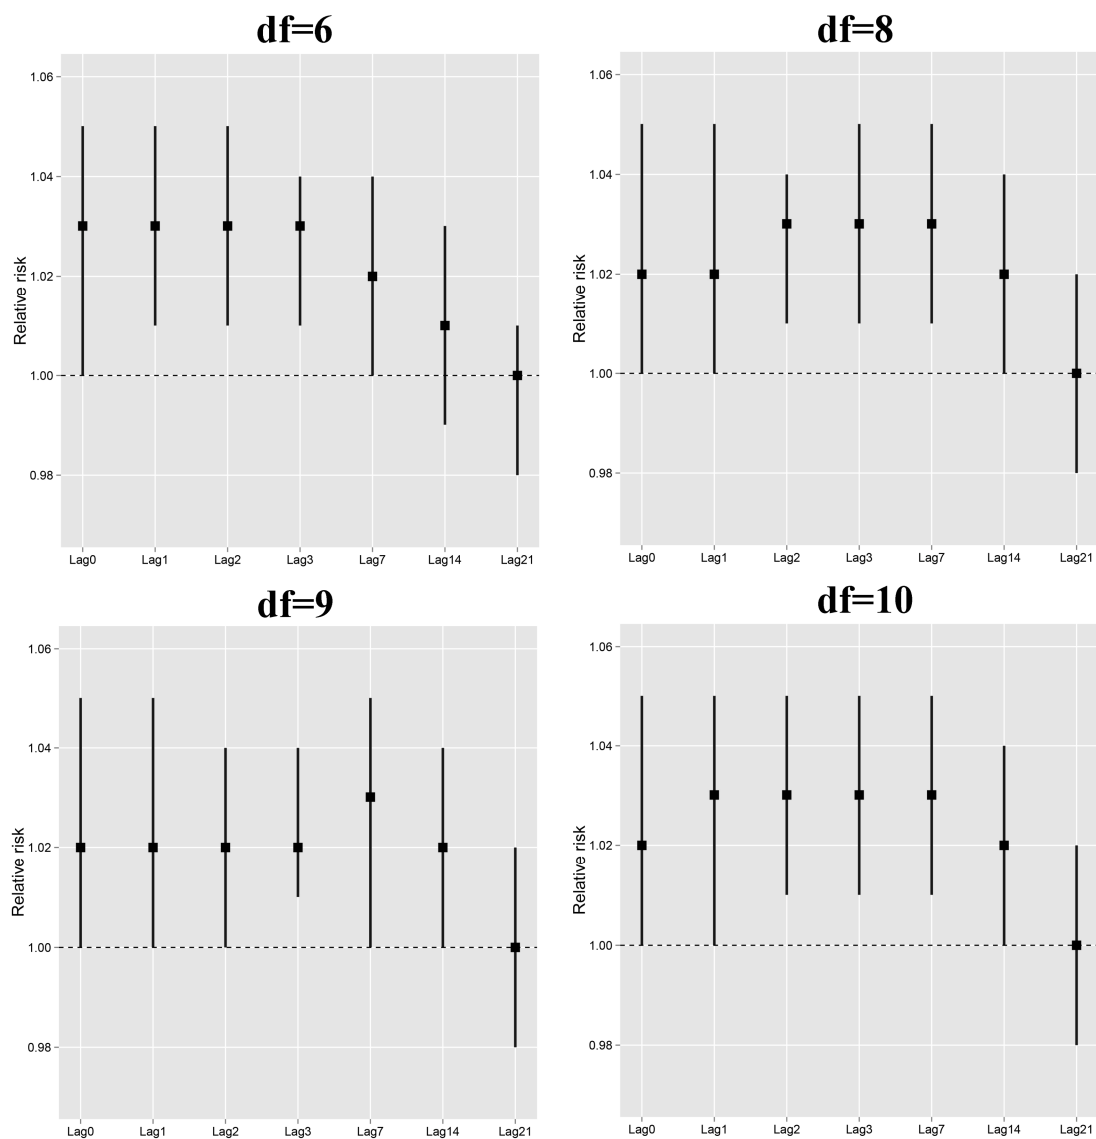

**Supplementary Fig.1** The effects of moderate temperature change (1.9°C) on mortality, when changing the *df* for year (6-10) in Maanshan, China, during 2008-2012. The squares and long solid lines indicate the relative risk and its 95% confidence interval; the short dashed lines indicate that the value of relative risk is 1.

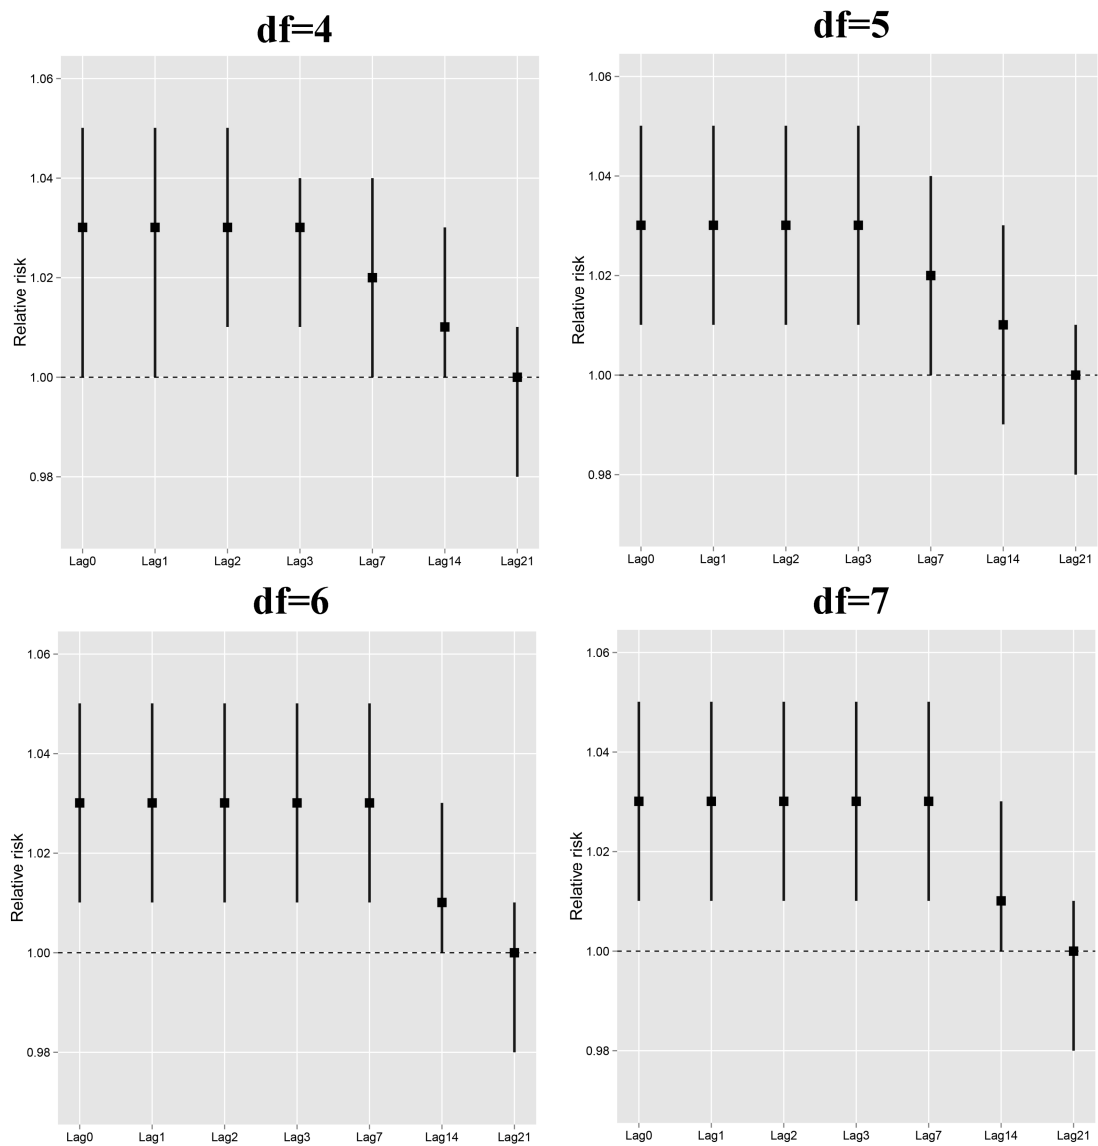

**Supplementary Fig.2** The effects of moderate temperature change ( $1.9^{\circ}\text{C}$ ) on mortality, when changing the  $df$  for temperature and relative humidity (4-7) in Maanshan, China, during 2008-2012. The squares and long solid lines indicate the relative risk and its 95% confidence interval; the short dashed lines indicate that the value of relative risk is 1.
